# Supplementary material
Source: ML conference proceedings conference paper supplement (https://proceedings.neurips.cc/paper_files/paper/2015/hash/f47d0ad31c4c49061b9e505593e3db98-Abstract.html)
Supplement: Supplementary file 1 [file f47d0ad31c4c49061b9e505593e3db98-Supplemental.zip]

Archive with 1 entries (1 files):
- supp_fodt.pdf
